# Supplementary material
Source: PubMed Central journal article supplement (PMC8548315)
Supplement: 41416_2021_1530_MOESM2_ESM.pdf [file 41416_2021_1530_MOESM2_ESM.pdf]

**Table S1: Truncated O-glycans in normal, tumor adjacent and inflamed tissue**

|                              | Positive/Total (% Positive) |              |             |               |             |              |
|------------------------------|-----------------------------|--------------|-------------|---------------|-------------|--------------|
|                              | Tn                          |              | STn         |               | T           |              |
| <b>Normal tissue</b>         |                             |              |             |               |             |              |
| Adrenal gland                | 0/3                         | (0%)         | 0/3         | (0%)          | 0/3         | (0%)         |
| Bone                         | 0/4                         | (0%)         | N/D         |               | 0/4         | (0%)         |
| Bone marrow                  | 0/5                         | (0%)         | 0/5         | (0%)          | 0/3         | (0%)         |
| Breast                       | 0/2                         | (0%)         | 0/2         | (0%)          | 0/2         | (0%)         |
| Cerebellum                   | 0/3                         | (0%)         | 0/3         | (0%)          | 0/3         | (0%)         |
| Cerebrum                     | 0/8                         | (0%)         | 0/6         | (0%)          | 0/6         | (0%)         |
| Colon                        | 0/13                        | (0%)         | <b>4/13</b> | <b>(31%)</b>  | <b>1/13</b> | <b>(8%)</b>  |
| Diaphragm                    | 0/1                         | (0%)         | 0/1         | (0%)          | 0/1         | (0%)         |
| Esophagus                    | 0/3                         | (0%)         | <b>3/3</b>  | <b>(100%)</b> | 0/3         | (0%)         |
| Heart                        | 0/3                         | (0%)         | 0/3         | (0%)          | 0/3         | (0%)         |
| Hypophysis                   | 0/3                         | (0%)         | 0/3         | (0%)          | 0/3         | (0%)         |
| Kidney                       | 0/3                         | (0%)         | 0/3         | (0%)          | 0/3         | (0%)         |
| Larynx                       | 0/3                         | (0%)         | <b>1/3</b>  | <b>(33%)</b>  | <b>1/3</b>  | <b>(33%)</b> |
| Liver                        | 0/3                         | (0%)         | 0/3         | (0%)          | 0/3         | (0%)         |
| Lung                         | 0/4                         | (0%)         | 0/4         | (0%)          | 0/4         | (0%)         |
| Lymph node                   | 0/3                         | (0%)         | 0/3         | (0%)          | 0/3         | (0%)         |
| Nerve                        | 0/3                         | (0%)         | 0/3         | (0%)          | 0/3         | (0%)         |
| Pancreas                     | 0/23                        | (0%)         | 0/23        | (0%)          | <b>4/23</b> | <b>(17%)</b> |
| Pericardium                  | 0/2                         | (0%)         | 0/2         | (0%)          | 0/2         | (0%)         |
| Prostate                     | 0/3                         | (0%)         | 0/3         | (0%)          | 0/3         | (0%)         |
| Salivary gland               | 0/2                         | (0%)         | 0/2         | (0%)          | 0/2         | (0%)         |
| Skeletal muscle              | 0/4                         | (0%)         | N/D         |               | 0/4         | (0%)         |
| Skin                         | 0/3                         | (0%)         | 0/3         | (0%)          | <b>2/3</b>  | <b>(67%)</b> |
| Small intestine              | 0/3                         | (0%)         | 0/3         | (0%)          | 0/3         | (0%)         |
| Spleen                       | 0/3                         | (0%)         | 0/3         | (0%)          | 0/3         | (0%)         |
| Stomach                      | 0/3                         | (0%)         | 0/3         | (0%)          | 0/3         | (0%)         |
| Testis                       | 0/3                         | (0%)         | 0/3         | (0%)          | 0/3         | (0%)         |
| Thymus gland                 | 0/3                         | (0%)         | 0/3         | (0%)          | 0/3         | (0%)         |
| Thyroid gland                | 0/3                         | (0%)         | 0/3         | (0%)          | 0/3         | (0%)         |
| Uterus                       | 0/2                         | (0%)         | 0/2         | (0%)          | 0/2         | (0%)         |
| <b>Tumor adjacent tissue</b> |                             |              |             |               |             |              |
| Bone marrow                  | 0/2                         | (0%)         | 0/2         | (0%)          | N/D         |              |
| Brain                        | 0/5                         | (0%)         | 0/5         | (0%)          | 0/5         | (0%)         |
| Breast                       | <b>1/4</b>                  | <b>(25%)</b> | 0/4         | (0%)          | <b>3/4</b>  | <b>(75%)</b> |
| Cervix                       | 0/3                         | (0%)         | 0/3         | (0%)          | 0/3         | (0%)         |
| Eye                          | 0/3                         | (0%)         | 0/3         | (0%)          | 0/3         | (0%)         |
| Ovary                        | 0/3                         | (0%)         | 0/3         | (0%)          | 0/3         | (0%)         |
| Pancreas                     | 0/48                        | (0%)         | 0/48        | (0%)          | <b>8/48</b> | <b>(17%)</b> |
| Salivary gland               | 0/1                         | (0%)         | N/D         |               | 0/1         | (0%)         |
| Tonsil                       | 0/3                         | (0%)         | <b>1/3</b>  | <b>(33%)</b>  | 0/3         | (0%)         |
| Uterus                       | 0/1                         | (0%)         | 0/1         | (0%)          | 0/1         | (0%)         |
| <b>Inflamed tissue</b>       |                             |              |             |               |             |              |
| Acute pancreatitis           | 0/4                         | (0%)         | 0/4         | (0%)          | 0/4         | (0%)         |
| Chronic pancreatitis         | 0/12                        | (0%)         | 0/12        | (0%)          | 0/12        | (0%)         |

**Supplementary Table 1: Truncated O-glycans in normal, tumor adjacent and inflamed**

**tissue.** The number of normal tissue samples classified as positive for Tn-, STn-, or T-expression defined as a) strong staining, b) membranous accentuation and c) more than 10 % of the tumor being strongly stained using IHC (before /) relative to the total number of tumor cores sampled (after /). Percentage of positive samples is given in brackets. Tn = Thomsen-nouveau antigen; GalNAc $\alpha$ -Ser/Thr. STn = sialyl-Tn antigen; Neu5Ac $\alpha$ 2-6GalNAc $\alpha$ -Ser/Thr. T = Thomsen-Friedenreich antigen; Gal $\beta$ 1-3GalNAc $\alpha$ -Ser/Thr.
